# Supplementary material
Source: MDPI journal article supplement (https://www.mdpi.com/2072-4292/12/18/3093)
Supplement: s1 [file s1]

# In Situ Aircraft Measurements of CO<sub>2</sub> and CH<sub>4</sub>: Mapping Spatio-Temporal Variations over Western Korea in High-Resolutions

Shanlan Li <sup>1</sup>, Youngmi Kim <sup>2</sup>, Jinwon Kim <sup>1</sup>, Samuel Takele Kenea <sup>1</sup>, Tae-Young Goo <sup>3, \*</sup>, Lev Labzovskii <sup>4</sup> and Young-Hwa Byun <sup>1</sup>

<sup>1</sup> Innovative Meteorological Research Department, National Institute of Meteorological Sciences (NIMS), Seogwipo, Jeju-do, Republic of Korea;

<sup>2</sup> Planning and Finance Division, National Institute of Meteorological Sciences (NIMS), Seogwipo, Jeju-do, Republic of Korea;

<sup>3</sup> Convergence Meteorological Research Department, National Institute of Meteorological Sciences (NIMS), Seogwipo, Jeju-do, Republic of Korea;

<sup>4</sup> R&D Satellite and Observations Group, Royal Netherlands Meteorological Institute (KNMI), De Bilt, Netherlands;

\* Correspondence: gooty@korea.kr; Tel.: +82-64-7806681

Received: date; Accepted: date; Published: date

**Table S1.** The instrumentation installed on a Korean Meteorological Administration (KMA) research aircraft based on the Beechcraft King Air 350.

**Figure S1.** Photo of a Nafion membrane installed chamber box (a) without and (b) with a silica gel dryer; it was designed for Korean Meteorological Administration (KMA) research aircraft King Air 350 cavity ring-down spectroscopy (CRDS) measurements.

**Figure S2.** Cavity ring-down spectroscopy (CRDS) reported water vapor concentration ranges (%) for whole climate change monitoring (CM) missions for 2019.

**Figure S3.** The CO<sub>2</sub> dry mole fractions (DMF) corresponding to NOAA standard gas at DMF of 467.78 ppm for CO<sub>2</sub> with gradually decreasing inlet pressure ranges of 280–1000 hPa.

**Figure S4.** Regression slope (RS) between  $\Delta$ CO and  $\Delta$ CO<sub>2</sub> along the flight route and flying altitude above mean sea level (AMSL), the dotted line shows the ECMWF ERA5 derived boundary layer height (BLH) at longitude 126.5–127°E and UTC time (0300–0700). However, the BLH on the CM.2 mission was calculated with the King Air aircraft observed potential temperature difference and relative humidity (RH) because the ECMWF-derived BLH seems to be largely underestimated.

**Figure S5.** Spatiotemporal distributions of CO for all climate change monitoring (CM) missions. The figure depicts CO concentrations measured within the boundary layer are averaged at the latitude bins of 0.075° (approximately 5-km spatial resolution) and temporally interpolated with the aircraft sampled time (all the aircraft sample times denoted by CM.1 through CM.9 are provided in Table 4).

**Table S1.** The instrumentation installed on Korean meteorological Administration (KMA) research aircraft based on Beechcraft King Air 350.

| No. | Instrumentations                      | Measured Parameters                                                                        |
|-----|---------------------------------------|--------------------------------------------------------------------------------------------|
| 1   | CRDS                                  | CO <sub>2</sub> , CH <sub>4</sub> , CO, H <sub>2</sub> O                                   |
| 2   | NOx analyzer                          | NO, NO <sub>2</sub>                                                                        |
| 3   | NOy analyzer                          | NOy                                                                                        |
| 4   | SO <sub>2</sub> Analyzer              | Sulfur dioxide (SO <sub>2</sub> )                                                          |
| 5   | O <sub>3</sub> analyzer               | Ozone (O <sub>3</sub> )                                                                    |
| 6   | Sky-optical particle counter (OPC)    | Particle concentrations in 32 channels over a range of 0.25–32 $\mu$ m                     |
| 7   | Nephelometer                          | Light-scattering coefficient of aerosols particles in three wavelengths (450, 550, 770 nm) |
| 8   | Single particle soot photometer (SP2) | Black carbon mass, number, and sizes                                                       |

|    |                                                                                 |                                                                                                                         |
|----|---------------------------------------------------------------------------------|-------------------------------------------------------------------------------------------------------------------------|
| 9  | Advanced Volume-Assured Pressure Support (AVAPS) II Dropsonde Receiving Systems | Pressure, temperature, relative humidity, horizontal wind                                                               |
| 10 | Atmospheric Gamma-Ray Spectrometer (RSX-3)                                      | Gamma ray                                                                                                               |
| 11 | Camera (AVS-860)                                                                | Image of atmosphere, surface, ocean                                                                                     |
| 12 | Stepped Frequency Microwave Radiometer (SFMR)                                   | Ocean surface wind so on                                                                                                |
| 13 | G-Band Water Vapor Radiometer (GVR)                                             | Water vapor and liquid water concentration                                                                              |
| 14 | Fuselage (ejectable) flare racks for seeding                                    | 102 ejectable silver iodide (AgI)                                                                                       |
| 15 | Wing (Burn-In-Place) flare racks for seeding                                    | 24 burn-in-place hygroscopic flares (CaCl <sub>2</sub> , AgI)                                                           |
| 16 | Cloud condensation nuclei counter (CCN-200)                                     | Sing-particle light scattering (for activated nuclei)                                                                   |
| 17 | Cloud combination probe (CCP)                                                   | Particle (size range: 12.5 $\mu\text{m}$ –1.55 mm and 2–50 $\mu\text{m}$ ) Liquid water content (0~5 g/m <sup>3</sup> ) |
| 18 | Precipitation imaging probe (PIP)                                               | Particle (size range: 100 $\mu\text{m}$ –6.2 mm); Particle images                                                       |
| 19 | Multi-element water content system (WCM-2000)                                   | Water amount                                                                                                            |
| 20 | Aircraft-Integrated Meteorological Measurement System (AIMMS-20)                | Temperature, Relative Humidity, pressure, Three-dimensional wind, latitude, longitude, altitude, speed, etc.            |
| 21 | M300                                                                            | Data acquisition system                                                                                                 |
| 22 | Total Temperature sensor                                                        | Temperature                                                                                                             |
| 23 | Dew Point Hygrometer                                                            | Dew point temperature                                                                                                   |
| 24 | Icing detector                                                                  | Presence of ice                                                                                                         |
| 25 | External air inlet system                                                       | Iso-kinetic inlet for aerosol and gas inlet                                                                             |

38

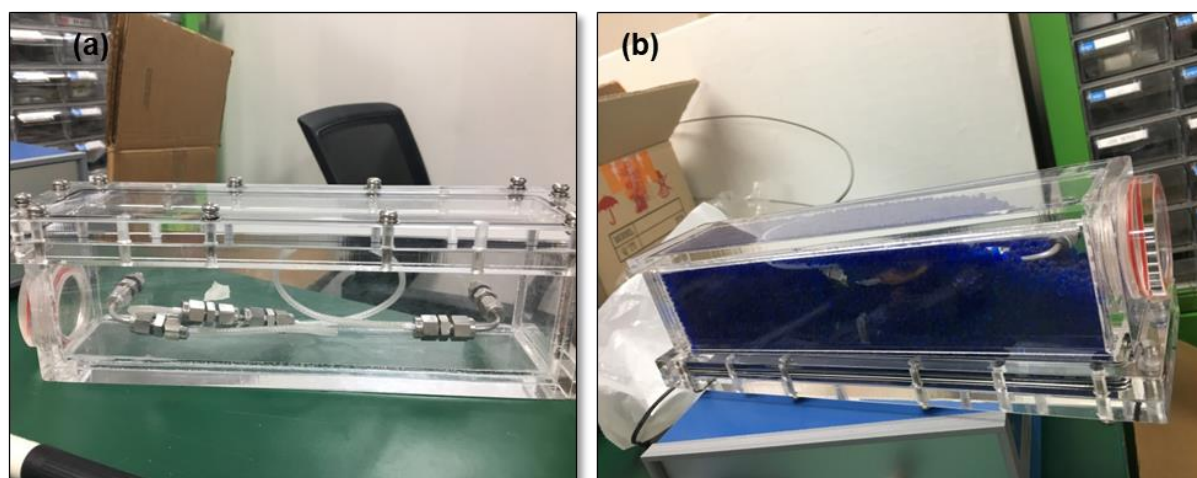

39

40

41

42

**Figure S1.** Photo of Nafion membrane installed chamber box (a) without and (b) with silica gel dryer; it was designed for Korean Meteorological Administration (KMA) research aircraft King Air 350 cavity ring-down spectroscopy (CRDS) measurements.

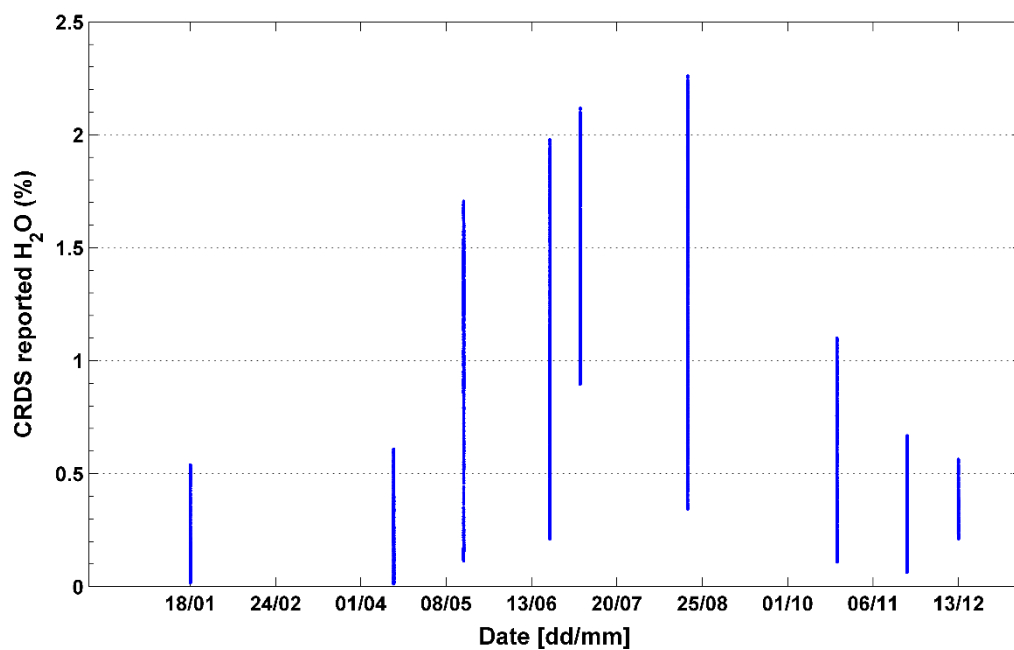

**Figure S2.** Cavity ring-down spectroscopy (CRDS) reported water vapor concentration ranges (%) during climate change monitoring (CM) missions.

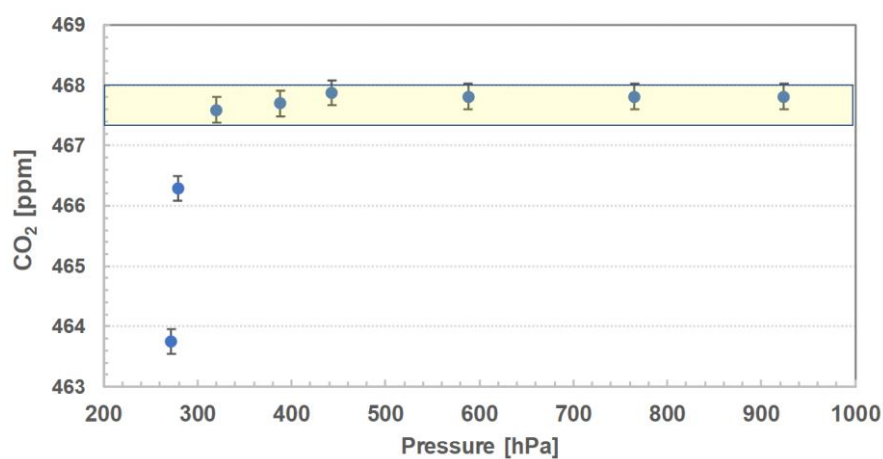

**Figure S3.** The CO<sub>2</sub> dry mole fractions (DMF) corresponding to NOAA standard gas at DMF of 467.78 ppm for CO<sub>2</sub> with gradually decreasing inlet pressure ranges of 280 to 1000 hPa.

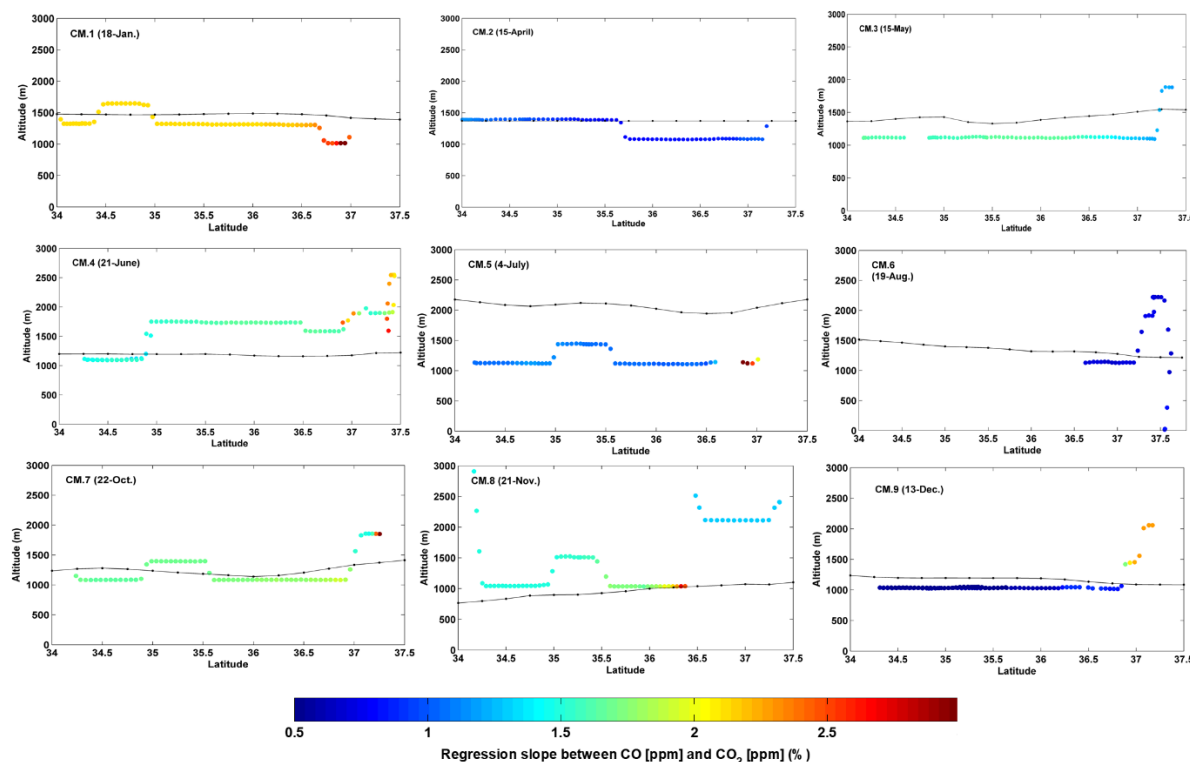

**Figure S4.** Regression slope (RS) between  $\Delta\text{CO}$  and  $\Delta\text{CO}_2$  along the flight route and flying altitude above mean sea level (AMSL), the dotted line shows the ECMWF ERA5 derived Boundary Layer Height (BLH) at longitude 126.5–127°E and UTC time (0300–0700). However, the BLH on CM.2 mission were calculated with our aircraft observed potential temperature difference and relative humidity (RH) because the ECMWF derived BLH seems to be largely underestimated.

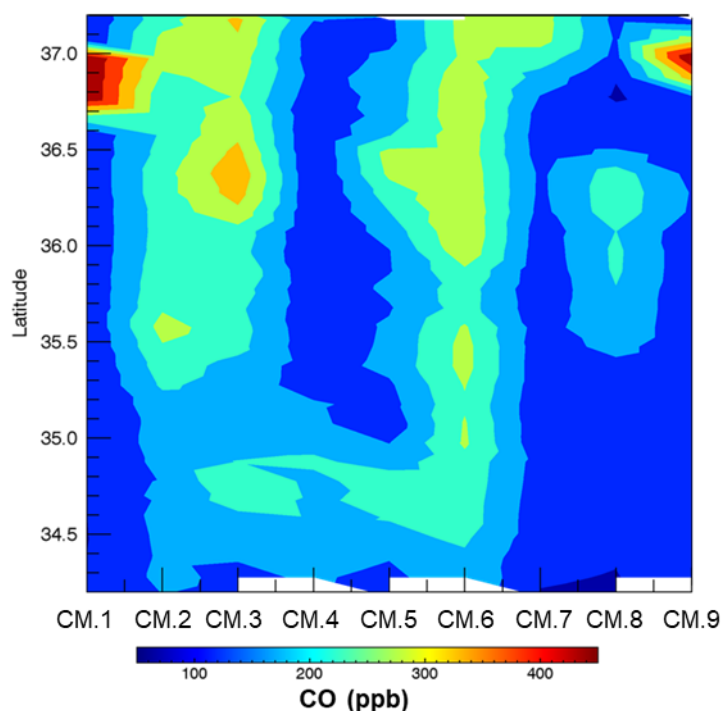

**Figure S5.** Spatio-temporal distributions of CO for whole climate change monitoring (CM) missions. The figure depicted CO concentrations measured within the boundary layer are averaged at the latitude bins of 0.075° (approximately 5-km spatial resolutions) and temporally interpolated with the data from Figure S4.

59 aircraft sampled time (all the aircraft sample time denoted by CM.1 through CM.9 are provided in  
60 Table 4).
